# Supplementary material
Source: PubMed Central journal article supplement (PMC3167528)
Supplement: 1105613108_pnas.201105613SI.pdf [file 1105613108_pnas.201105613SI.pdf]

# Supporting Information

Le Coq and Ghosh 10.1073/pnas.1105613108

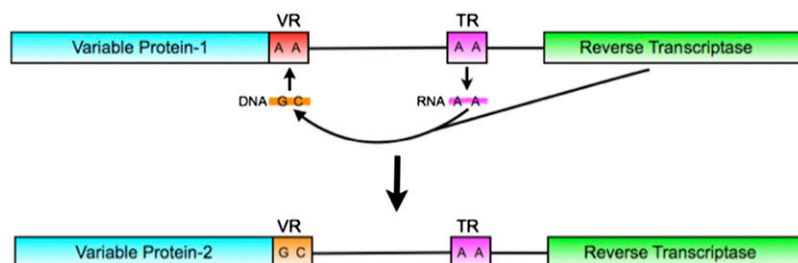

**Fig. S1.** Diversity generation. Genetic information is transferred from the invariant TR to the protein-encoding the VR at the C terminus of the DGR-variable protein through the action of the DGR reverse transcriptase on TR RNA. Two adenines in the TR are shown to be randomly mutated to other bases (G and C here) and incorporated into the coding locus of the variable protein to give rise to a new variant.

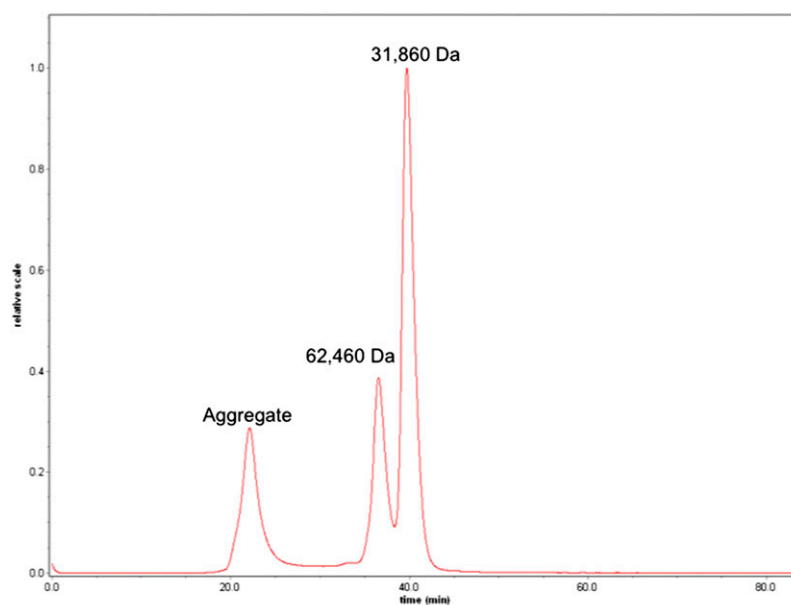

**Fig. S2.** Size-exclusion profile of TvpA. The molecular masses determined for TvpA by static light scattering of peak fractions are indicated. The calculated molecular mass of TvpA is 32,136 Da.

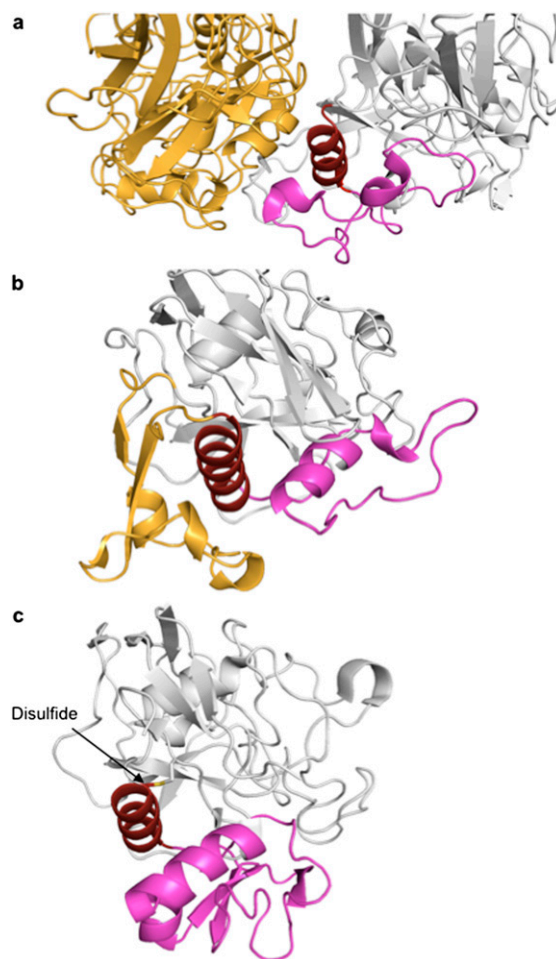

**Fig. 53.** The role of insert 1'. (A) Ribbon representation of one of the protomer–protomer interfaces in trimeric Mtd. The gray protomer has the  $\alpha$ 1 helix in red and insert 1 in magenta. The second protomer is in gold. (B) Ribbon representation of Tvpa, with the  $\alpha$ 1 helix colored red, insert 1 magenta, and insert 1' gold. The rest of Tvpa is colored gray. (C) Ribbon representation of hFGE. The disulfide bond between C218 and C365 is represented as sticks. The  $\alpha$ 1 helix is red and insert 1 is magenta. The rest of hFGE is colored gray.

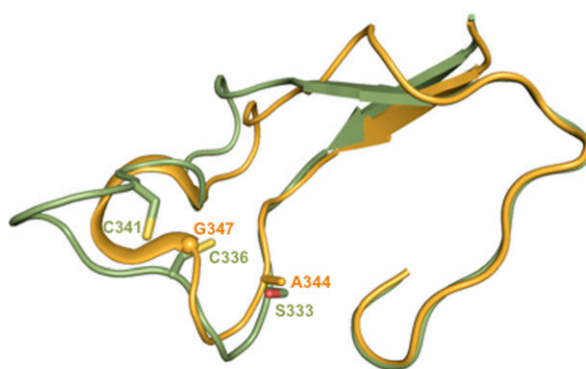

```

Mtd-P1 337 AAALFGGANN.GSLS.GSRAALWYSG.PSPSFVFFGARGVCDHL.ILE 381
hFGE   329 ...KKGGSYMCHRSYCYRYRCAARSQNTFDSASNLGFRCAADRLPTMD 371

```

**Fig. 54.** Relationship of Mtd to FGE. Superposition of the VR of Mtd-P1 (orange) and the catalytic site of hFGE (green) in  $C\alpha$  representation. *Bottom:* Sequence alignment of the regions shown above. Mtd-P1 variable residues denoted by spheres and hFGE catalytic residues by arrows. Identical residues are in red and chemically similar ones are in blue.

**Table S1. Crystallographic statistics**

| Parameter                                          | Native                                        | Hg derivative                                 |
|----------------------------------------------------|-----------------------------------------------|-----------------------------------------------|
| Data collection                                    |                                               |                                               |
| Space group                                        | P2 <sub>1</sub> 2 <sub>1</sub> 2 <sub>1</sub> | P2 <sub>1</sub> 2 <sub>1</sub> 2 <sub>1</sub> |
| Cell dimensions <i>a</i> , <i>b</i> , <i>c</i> , Å | 41.39, 77.63, 88.92                           | 41.59, 77.24, 87.37                           |
| Wavelength, Å                                      | 1.033                                         | 0.98792                                       |
| Resolution, Å*                                     | 44.46–1.40 (1.46–1.40)                        | 38.63–2.10 (2.21–2.10)                        |
| Completeness, %*                                   | 99.9 (100)                                    | 99.4 (99.9)                                   |
| R <sub>merger</sub> , %*                           | 10.7 (31.7)                                   | 9.3 (33.8)                                    |
| I/σI*                                              | 3.5 (2.2)                                     | 6.3 (2.2)                                     |
| Redundancy*                                        | 7.2 (7.0)                                     | 6.6 (6.2)                                     |
| Refinement                                         |                                               |                                               |
| Resolution, Å                                      | 44.46–1.40                                    |                                               |
| No. of reflections                                 | 411,914                                       |                                               |
| R <sub>work</sub> /R <sub>free</sub> , %           | 14.6/17.3                                     |                                               |
| No. of atoms                                       |                                               |                                               |
| Protein                                            | 2296                                          |                                               |
| Ligand/ion                                         | 36/3                                          |                                               |
| Water                                              | 256                                           |                                               |
| B factors, Å <sup>2</sup>                          |                                               |                                               |
| Protein                                            | 13.06                                         |                                               |
| Ligand/ion                                         | 28.02/17.03                                   |                                               |
| Water                                              | 25.28                                         |                                               |
| rmsd                                               |                                               |                                               |
| Bond lengths, Å                                    | 0.0063                                        |                                               |
| Bond angles, °                                     | 1.096                                         |                                               |

\*Values in parentheses are for the highest resolution shell.
